# Supplementary material
Source: PubMed Central journal article supplement (PMC4321798)
Supplement: NIHMS660113-supplement-01.pdf [file NIHMS660113-supplement-01.pdf]

**TABLE S1** Meta-regression Results for Age, Dose, and Study Quality on Parent and Teacher Reports

| Meta-regression exposure duration, parent report, all studies |          |       |        |       |       |       |
|---------------------------------------------------------------|----------|-------|--------|-------|-------|-------|
|                                                               | Estimate | SE    | Lower  | Upper | z     | p     |
| Slope                                                         | 0.000    | 0.000 | 0.000  | 0.001 | 0.750 | .453  |
| Intercept                                                     | 0.120    | 0.054 | 0.014  | 0.226 | 2.223 | .026  |
| $\tau^2$                                                      | 0.027    |       |        |       |       |       |
|                                                               | Q        | df    | p      |       |       |       |
| Model                                                         | 0.563    | 1     | .453   |       |       |       |
| Residual                                                      | 38.629   | 17    | .002   |       |       |       |
| Total                                                         | 39.193   | 18    | .003   |       |       |       |
| Meta-regression child age, parent report, all studies         |          |       |        |       |       |       |
|                                                               | Estimate | SE    | Lower  | Upper | z     | p     |
| Slope                                                         | 0.023    | 0.016 | -0.008 | 0.054 | 1.461 | 0.144 |
| Intercept                                                     | 0.005    | 0.106 | -0.204 | 0.213 | 0.042 | 0.966 |
| $\tau^2$                                                      | 0.029    |       |        |       |       |       |
|                                                               | Q        | df    | p      |       |       |       |
| Model                                                         | 2.134    | 1     | .144   |       |       |       |
| Residual                                                      | 37.059   | 17    | .003   |       |       |       |
| Total                                                         | 39.193   | 18    | .003   |       |       |       |
| Meta-regression dose, parent report, all studies <sup>a</sup> |          |       |        |       |       |       |
|                                                               | Estimate | SE    | Lower  | Upper | z     | p     |
| Slope                                                         | 0.002    | 0.001 | 0.000  | 0.004 | 2.120 | .034  |
| Intercept                                                     | 0.064    | 0.053 | -0.039 | 0.167 | 1.218 | .223  |
| $\tau^2$                                                      | 0.025    |       |        |       |       |       |
|                                                               | Q        | df    | p      |       |       |       |
| Model                                                         | 4.496    | 1     | .034   |       |       |       |
| Residual                                                      | 31.278   | 15    | .008   |       |       |       |
| Total                                                         | 35.774   | 16    | .003   |       |       |       |
| Meta-regression dose, parent report, all studies <sup>b</sup> |          |       |        |       |       |       |
|                                                               | Estimate | SE    | Lower  | Upper | z     | p     |
| Slope                                                         | 0.000    | 0.003 | -0.005 | 0.006 | 0.154 | .878  |
| Intercept                                                     | 0.113    | 0.089 | -0.061 | 0.286 | 1.271 | .204  |
|                                                               | Q        | df    | p      |       |       |       |
| Model                                                         | 0.024    | 1     | .878   |       |       |       |
| Residual                                                      | 30.816   | 14    | .006   |       |       |       |
| Total                                                         | 30.839   | 15    | .009   |       |       |       |

TABLE S1 Continued

| Meta-regression 6-point quality score and parent rating <sup>c</sup> |          |       |        |       |        |      |
|----------------------------------------------------------------------|----------|-------|--------|-------|--------|------|
|                                                                      | Estimate | SE    | Lower  | Upper | z      | p    |
| Slope                                                                | -0.020   | 0.019 | -0.058 | 0.018 | -1.024 | .306 |
| Intercept                                                            | 0.249    | 0.098 | 0.056  | 0.441 | 2.527  | .012 |
| r <sup>2</sup>                                                       | 0.027    |       |        |       |        |      |
|                                                                      | Q        | df    | p      |       |        |      |
| Model                                                                | 1.048    | 1     | .306   |       |        |      |
| Residual                                                             | 38.145   | 17    | .002   |       |        |      |
| Total                                                                | 39.193   | 18    | .003   |       |        |      |
| Teacher data age meta-regression                                     |          |       |        |       |        |      |
|                                                                      | Estimate | SE    | Lower  | Upper | z      | p    |
| Slope                                                                | 0.008    | 0.019 | -0.030 | 0.046 | 0.415  | .678 |
| Intercept                                                            | 0.021    | 0.139 | -0.252 | 0.294 | 0.151  | .880 |
| r <sup>2</sup>                                                       | 0        |       |        |       |        |      |
|                                                                      | Q        | Df    | p      |       |        |      |
| Model                                                                | 0.172    | 1     | 0.678  |       |        |      |
| Residual                                                             | 5.854    | 8     | 0.664  |       |        |      |
| Total                                                                | 6.026    | 9     | 0.737  |       |        |      |
| Teacher data dosage meta-regression                                  |          |       |        |       |        |      |
|                                                                      | Estimate | SE    | Lower  | Upper | z      | p    |
| Slope                                                                | 0.008    | 0.019 | -0.030 | 0.046 | 0.415  | .678 |
| Intercept                                                            | 0.021    | 0.139 | -0.252 | 0.294 | 0.151  | .880 |
| r <sup>2</sup>                                                       | 0        |       |        |       |        |      |
|                                                                      | Q        | df    | p      |       |        |      |
| Model                                                                | 0.172    | 1     | .678   |       |        |      |
| Residual                                                             | 5.854    | 8     | .664   |       |        |      |
| Total                                                                | 6.026    | 9     | .737   |       |        |      |
| Teacher data duration of trial meta-regression                       |          |       |        |       |        |      |
|                                                                      | Estimate | SE    | Lower  | Upper | Z      | p    |
| Slope                                                                | 0.008    | 0.019 | -0.030 | 0.046 | 0.415  | .678 |
| Intercept                                                            | 0.021    | 0.139 | -0.252 | 0.294 | 0.151  | .880 |
| r <sup>2</sup>                                                       | 0        |       |        |       |        |      |
|                                                                      | Q        | df    | p      |       |        |      |
| Model                                                                | 0.172    | 1     | .678   |       |        |      |
| Residual                                                             | 5.854    | 8     | .664   |       |        |      |
| Total                                                                | 6.026    | 9     | .737   |       |        |      |

TABLE S1 Continued

| Teacher global quality <sup>d</sup> |          |       |        |       |        |      |
|-------------------------------------|----------|-------|--------|-------|--------|------|
|                                     | Estimate | SE    | Lower  | Upper | z      | p    |
| Slope                               | -0.004   | 0.027 | -0.057 | 0.048 | -0.154 | .878 |
| Intercept                           | 0.107    | 0.135 | -0.156 | 0.371 | 0.798  | .425 |
| $r^2$                               | 0        |       |        |       |        |      |
|                                     | Q        | df    | p      |       |        |      |
| Model                               | 0.024    | 1     | .878   |       |        |      |
| Residual                            | 6.218    | 8     | .623   |       |        |      |
| Total                               | 6.241    | 9     | .716   |       |        |      |

Note: SE = standard error.

<sup>a</sup>Excludes Rapp<sup>1</sup> (dose no applicable/available, sublingual delivery), David<sup>2</sup> (dose outlier); the significant and slightly positive slope effect indicates a tendency for larger effects with larger doses.

<sup>b</sup>Also excludes Pollock *et al.*,<sup>3</sup> as the next highest outlier, in an effort to ascertain any effect.

<sup>c</sup>The quality score gave one point for each of the following: standardized and reliable outcome measure, successful effort to validate blind; well explained and convincing blinding attempt; data presented clearly and completely; analytic approach consistent with a priori expectations of analysis (minimal capitalization on chance); and absence of any other obvious or major flaw in the study. The negative slope indicates a slight tendency for higher quality studies to yield smaller effect sizes, but this association was not statistically reliable.

<sup>d</sup>The quality score gave one point for each of the following: standardized and reliable outcome measure, successful effort to validate blind; well-explained and convincing blinding attempt; data presented clearly and completely; analytic approach consistent with a priori expectations of analysis (minimal capitalization on chance); and absence of any other obvious or major flaw in the study. The negative slope indicates a slight tendency for higher quality studies to yield smaller effect sizes, but this association was trivial in size and not statistically reliable.

**TABLE S2** Details of Reasons for Exclusion and Inclusion of Each Study from Each Analysis

| 1 <sup>st</sup> Author, Year               | Parent | Teacher | Test   |
|--------------------------------------------|--------|---------|--------|
| Adams, 1981 <sup>4</sup>                   | 2      | 1       | 1,2,3, |
| Bateman et al, 2004 <sup>5</sup>           | 3,4    | NA      | 4      |
| Conners, 1980, Ch 5 <sup>6</sup>           | 1      | NA      | NA     |
| Conners et al, 1980 <sup>7 a</sup>         | NA     | NA      | 1,4    |
| David, 1987 <sup>2</sup>                   | 2      | 2       | NA     |
| Goyette et al, 1978a <sup>8 b</sup>        | 1      | NA      | 1      |
| Goyette et al, 1978b <sup>8 c</sup>        | 1      | NA      | NA     |
| Gross et al, 1987 <sup>9</sup>             | NA     | NA      | NA     |
| Harley et al, 1978 <sup>10</sup>           | 1      | 1       | NA     |
| Levy and Hobbes, 1978 <sup>11</sup>        | 2, 4   | NA      | NA     |
| Mattes and Gittelman, 1981 <sup>12</sup>   | 1      | 2       | 1      |
| McCann et al, 2007a <sup>13</sup>          | 3, 4   | 3,4     | NA     |
| McCann et al, 2007b <sup>13</sup>          | 3, 4   | 3,4     | 1      |
| Pollock and Warner, 1990 <sup>3</sup>      | 4      | NA      | NA     |
| Rapp, 1978 <sup>1</sup>                    | 2      | NA      | 2      |
| Rowe, 1988 <sup>14</sup>                   | 2, 4   | NA      | NA     |
| Rowe and Rowe, 1994 <sup>15</sup>          | 2, 4   | NA      | NA     |
| Sarantinos et al, 1990 <sup>16</sup>       | 2      | NA      | NA     |
| Spring et al, 1981 <sup>17</sup>           | 1      | 1       | NA     |
| Swanson and Kinsbourne, 1980 <sup>18</sup> | NA     | NA      | 1      |
| Thorley, 1994 <sup>19</sup>                | NA     | 2       | NA     |
| Weiss et al, 1980 <sup>24</sup>            | 2      | NA      | NA     |
| Williams et al, 1978 <sup>21</sup>         | 4      | 1       | NA     |
| Wilson et al, 1989 <sup>22</sup>           | 2      | NA      | NA     |
| Total possible                             | 20     | 10      | 9      |

Note: Codes for Inclusion in Parent and Teacher/Observer Based analyses: 1 = data used in all analyses; 2 = data used, but excluded from analyses of high quality outcome measures; 3 = data used, but excluded from analyses of "dyes only" (has preservatives); 4 = data used, but excluded from analyses of Food and Drug Administration (FDA) only (has non-FDA colors).

Codes for Inclusion in Test based analyses: 1 = Attention test available (Matching Familiar Figures test, Partially Accelerated Life Test, Continuous Performance Test, Zero Input Tracking Analyzer, or other test); 2 = motor test available; 3 = language test available; 4 = other test available—not classified, excluded, or detailed in Table S3, available online.

<sup>a</sup>Conners, Newcorn, and Goyette, 1980; same study as Conners, 1980, chapter 6.

<sup>b</sup>Same as Conners, 1980, chapter 3

<sup>c</sup>Same as Conners, 1980, chapter 4

**TABLE S3** Detailed Data Corresponding to Figure 2 for Each Domain of Outcome

| Study                                 | Domain                | g      | SE    | Lower  | Upper | z      | p     |
|---------------------------------------|-----------------------|--------|-------|--------|-------|--------|-------|
| Adams, 1981 <sup>23</sup>             | Parent                | 0.692  | 0.196 | 0.308  | 1.076 | 3.531  | .000  |
| Bateman et al, 2004 <sup>5</sup>      | Parent                | 0.119  | 0.060 | 0.001  | 0.236 | 1.968  | .049  |
| Conners, 1980, Ch 5 <sup>6</sup>      | Parent                | -0.159 | 0.099 | -0.353 | 0.035 | -1.604 | .109  |
| David, 1987 <sup>2</sup>              | Parent                | 0.000  | 0.153 | -0.300 | 0.300 | 0.000  | 1.000 |
| Goyette et al, 1978a <sup>8</sup>     | Parent                | -0.188 | 0.157 | -0.495 | 0.119 | -1.199 | .231  |
| Goyette et al, 1978b <sup>8</sup>     | Parent                | 0.383  | 0.288 | -0.182 | 0.948 | 1.329  | .184  |
| Harley et al, 1978 <sup>10</sup>      | Parent                | 0.219  | 0.306 | -0.380 | 0.818 | 0.718  | .473  |
| Levy and Hobbes, 1978 <sup>11</sup>   | Parent                | 0.595  | 0.348 | -0.086 | 1.277 | 1.712  | .087  |
| Mattes et al, 1981 <sup>12</sup>      | Parent                | -0.165 | 0.281 | -0.715 | 0.385 | -0.588 | .557  |
| McCann et al, 2007a <sup>12 a</sup>   | Parent                | 0.198  | 0.098 | 0.005  | 0.391 | 2.015  | .044  |
| McCann et al, 2007b <sup>13 a</sup>   | Parent                | 0.118  | 0.096 | -0.070 | 0.306 | 1.230  | .219  |
| Pollock and Warner, 1990 <sup>3</sup> | Parent                | 0.343  | 0.092 | 0.163  | 0.523 | 3.736  | .000  |
| Rapp, 1978 <sup>1</sup>               | Parent                | 0.478  | 0.209 | 0.068  | 0.888 | 2.286  | .022  |
| Rowe and Rowe, 1994 <sup>15</sup>     | Parent                | 0.211  | 0.136 | -0.055 | 0.477 | 1.555  | .120  |
| Rowe, 1988 <sup>14</sup>              | Parent                | 0.584  | 0.347 | -0.095 | 1.263 | 1.685  | .092  |
| Sarantinos et al, 1992 <sup>16</sup>  | Parent                | 0.181  | 0.262 | -0.333 | 0.695 | 0.691  | .490  |
| Spring et al, 1981 <sup>17</sup>      | Parent                | 0.431  | 0.957 | -1.444 | 2.306 | 0.450  | .652  |
| Weiss et al, 1980 <sup>24</sup>       | Parent                | 0.095  | 0.206 | -0.309 | 0.499 | 0.461  | .645  |
| Williams et al, 1978 <sup>21</sup>    | Parent                | 0.522  | 0.204 | 0.123  | 0.920 | 2.563  | .010  |
| Wilson and Scott, 1989 <sup>22</sup>  | Parent                | 0.000  | 0.358 | -0.701 | 0.701 | 0.000  | 1.000 |
| Adams, 1981 <sup>23</sup>             | Tchr/Obs <sup>b</sup> | 0.191  | 0.176 | -0.155 | 0.536 | 1.082  | .279  |
| Goyette et al, 1978a <sup>8</sup>     | Tchr/Obs <sup>b</sup> | 0.000  | 0.233 | -0.457 | 0.457 | 0.000  | 1.000 |
| Harley et al, 1978 <sup>10</sup>      | Tchr/Obs <sup>b</sup> | 0.068  | 0.270 | -0.461 | 0.596 | 0.251  | .802  |
| Mattes et al, 1981 <sup>12</sup>      | Tchr/Obs <sup>b</sup> | 0.175  | 0.317 | -0.447 | 0.797 | 0.551  | .582  |
| McCann et al, 2007a <sup>13</sup>     | Tchr/Obs <sup>b</sup> | 0.043  | 0.098 | -0.149 | 0.234 | 0.439  | .660  |
| McCann et al, 2007b <sup>13</sup>     | Tchr/Obs <sup>b</sup> | 0.039  | 0.096 | -0.149 | 0.227 | 0.407  | .684  |
| Spring et al, 1981-T <sup>17</sup>    | Tchr/Obs <sup>b</sup> | 0.378  | 0.949 | -1.482 | 2.238 | 0.398  | .690  |
| Williams et al, 1978-T <sup>21</sup>  | Tchr/Obs <sup>b</sup> | 0.512  | 0.203 | 0.114  | 0.910 | 2.524  | .012  |
| Adams, 1981 <sup>23</sup>             | Tests                 | 0.005  | 0.226 | -0.437 | 0.448 | 0.024  | .981  |
| Conners et al, 1980 <sup>6</sup>      | Tests                 | 0.801  | 0.355 | 0.105  | 1.498 | 2.255  | .024  |
| Goyette et al, 1978a <sup>8</sup>     | Tests                 | 0.318  | 0.244 | -0.160 | 0.796 | 1.304  | .192  |
| Mattes et al, 1981 <sup>12</sup>      | Tests                 | 0.099  | 0.359 | -0.605 | 0.803 | 0.276  | .783  |
| McCann et al, 2007b <sup>13</sup>     | Tests                 | 0.177  | 0.108 | -0.036 | 0.389 | 1.630  | .103  |
| Swanson et al, 1981 <sup>18</sup>     | Tests                 | 0.590  | 0.234 | 0.131  | 1.049 | 2.522  | .012  |

Note:  
<sup>a</sup>McCann et al, 2007a is their study of 3 year olds; 2007b is their study of 8-9 year olds.  
<sup>b</sup>Teacher ratings (Tchr) or observer coding (Obs), or both, were available. Here, they are pooled within study.

**TABLE S4** Task-based Studies, by Individual Study and by Type of Task

| 1 <sup>st</sup> Author, Year                          | Task                | n            | g            | SE           | Lower        | Upper        | z            | p      |
|-------------------------------------------------------|---------------------|--------------|--------------|--------------|--------------|--------------|--------------|--------|
| <b>Attention<sup>a</sup></b>                          |                     |              |              |              |              |              |              |        |
| Bateman, 1994 <sup>5</sup>                            | ATH composite       | 277          | 0.07         | 0.06         | -0.05        | 0.19         | 1.2          | .2300  |
| McCann, 2007 <sup>13</sup>                            | CPT                 | 86           | 0.18         | 0.11         | -0.04        | 0.39         | 1.63         | .1000  |
| Mattes, 1981 <sup>12</sup>                            | Distraction task    | 5            | 0.1          | 0.36         | -0.6         | 0.8          | 0.28         | .7800  |
| Adams, 1981 <sup>23</sup>                             | Memory tasks        | 18           | 0.01         | 0.23         | -0.44        | 0.45         | 0.02         | .9800  |
| Goyette, 1978 <sup>8</sup>                            | ZITA/ADT            | 16           | 0.32         | 0.24         | -0.16        | 0.8          | 1.3          | .1900  |
| Conners, 1980 <sup>6</sup>                            | PALT                | 9            | 0.8          | 0.36         | 0.1          | 1.5          | 2.25         | .0200  |
| Swanson, 1981 <sup>18</sup>                           | PALT                | 20           | 0.59         | 0.23         | 0.13         | 1.05         | 2.52         | .0100  |
| <b>Motor</b>                                          |                     |              |              |              |              |              |              |        |
| Adams, 1981 <sup>23</sup>                             | Motor battery       | 18           |              |              |              |              |              |        |
| Adams, 1981 <sup>23</sup>                             | Balance (hop)       | 18           | 0.54         | 0.24         | 0.06         | 1.01         | 2.22         | .0300  |
| Adams, 1981 <sup>23</sup>                             | Coordination (ball) | 18           | -0.3         | 0.16         | -0.62        | 0.02         | -1.86        | .0600  |
| Adams, 1981 <sup>23</sup>                             | Fine motor (draw)   | 18           | -0.03        | 0.13         | -0.28        | 0.23         | -0.2         | .8400  |
| Rapp, 1978 <sup>1</sup>                               | Ayres motor         | 24           | 0            | 0.2          | -0.39        | 0.39         | 0            | 1.0000 |
| <b>Language</b>                                       |                     |              |              |              |              |              |              |        |
| Adams, 1981 <sup>23</sup>                             | Picture Vocabul     | 18           | 0.40         | 0.24         | -0.06        | 0.87         | 1.72         | .0852  |
| Adams, 1981 <sup>23</sup>                             | Handwriting         |              | -0.14        | 0.23         | -0.58        | 0.30         | -0.62        | .5358  |
| <b>Physiology<sup>b</sup></b>                         |                     |              |              |              |              |              |              |        |
| Conners, 1980 <sup>6</sup>                            | Actigraph foot      | 9            | 0.90         | 0.37         | 0.18         | 1.63         | 2.45         | .0143  |
| Conners, 1980 <sup>6</sup>                            | Actigraph hand      | 9            | 0.06         | 0.30         | -0.53        | 0.65         | 0.20         | .8445  |
| <b>Physiology</b>                                     |                     |              |              |              |              |              |              |        |
| Restriction diet                                      |                     |              |              |              |              |              |              |        |
| Uhlig, 1997 <sup>20</sup>                             | EEG Central         | 12           | 0.37         | 0.28         | -0.18        | 0.91         | 1.31         | .1908  |
| Uhlig, 1997 <sup>20</sup>                             | EEG Frontal         | 12           | 0.71         | 0.31         | 0.11         | 1.31         | 2.31         | .0207  |
| Uhlig, 1997 <sup>20</sup>                             | EEG Posterior       | 12           | -0.21        | 0.14         | -0.49        | 0.07         | -1.45        | .1467  |
| Uhlig, 1997 <sup>20</sup>                             | EEG Temporal        | 12           | 0.43         | 0.30         | -0.15        | 1.01         | 1.45         | .1478  |
| <b>Summary Food colors</b>                            |                     |              |              |              |              |              |              |        |
| Motor overall                                         |                     | 42           | 0.02         | 0.15         | -0.27        | 0.32         | 0.15         | .8800  |
| PALT overall                                          |                     | 29           | 0.65         | 0.2          | 0.27         | 1.04         | 3.35         | .0008  |
| Attention pooled                                      |                     | 154          | 0.27         | 0.10         | 0.07         | 0.47         | 2.67         | .0074  |
| Attention not memory                                  |                     | 136          | 0.32         | 0.11         | 0.11         | 0.54         | 2.90         | .0037  |
| Language overall                                      |                     | 18           | 0.13         | 0.23         | -0.32        | 0.58         | 0.57         | .5668  |
| Study                                                 | Task(s)             | g Removed    | SE           | Lower        | Upper        | z            | p            |        |
| <b>One-Study-Removed Analysis for Attention Tasks</b> |                     |              |              |              |              |              |              |        |
| <b>Attention Studies (All)</b>                        |                     |              |              |              |              |              |              |        |
| Adams, 1981 <sup>23</sup>                             | Combined            | 0.323        | 0.111        | 0.105        | 0.541        | 2.902        | .0037        |        |
| Conners et al, 1980 <sup>6</sup>                      | PALT                | 0.217        | 0.082        | 0.056        | 0.378        | 2.637        | .0084        |        |
| Goyette et al, 1978 <sup>8</sup>                      | ZITA/ADT            | 0.279        | 0.127        | 0.030        | 0.528        | 2.196        | .0281        |        |
| Mattes and Gittleman, 1981 <sup>12</sup>              | distraction task    | 0.298        | 0.118        | 0.068        | 0.529        | 2.535        | .0112        |        |
| McCann et al, 2007 <sup>13</sup>                      | Combined            | 0.340        | 0.142        | 0.061        | 0.618        | 2.389        | .0169        |        |
| Swanson and Kinsbourne, 1981 <sup>18</sup>            | PALT                | 0.201        | 0.085        | 0.034        | 0.368        | 2.357        | .0184        |        |
| <b>Overall</b>                                        |                     | <b>0.272</b> | <b>0.102</b> | <b>0.073</b> | <b>0.471</b> | <b>2.677</b> | <b>.0074</b> |        |

TABLE S4 Continued

| Study                                      | Task(s)          | g Removed    | SE           | Lower        | Upper        | z            | p            |
|--------------------------------------------|------------------|--------------|--------------|--------------|--------------|--------------|--------------|
| <b>Attention Studies (Colors Only)</b>     |                  |              |              |              |              |              |              |
| Adams, 1981 <sup>23</sup>                  | Combined         | 0.458        | 0.140        | 0.183        | 0.733        | 3.262        | .0011        |
| Conners, et al., 1980 <sup>6</sup>         | PALT             | 0.271        | 0.138        | 0.001        | 0.542        | 1.965        | .0495        |
| Goyette et al., 1978a <sup>8</sup>         | ZITA/ADT         | 0.354        | 0.191        | -0.022       | 0.729        | 1.848        | .0647        |
| Mattes and Gittleman, 1981 <sup>12</sup>   | distraction task | 0.382        | 0.166        | 0.056        | 0.707        | 2.296        | .0217        |
| Swanson and Kinsbourne, 1981 <sup>18</sup> | PALT             | 0.255        | 0.160        | -0.058       | 0.569        | 1.598        | .1101        |
| <b>Overall</b>                             |                  | <b>0.340</b> | <b>0.142</b> | <b>0.061</b> | <b>0.618</b> | <b>2.389</b> | <b>.0169</b> |

Note: ADT = Auditory Discrimination Test; ATH = aggregated test hyperactivity; CPT = Continuous Performance Test; EEG = electroencephalography; PALT = Paired Associated Learning Test; SE = standard error; ZITA = Zero Input Tracking Analyzer.

<sup>a</sup>One-study-removed analysis for attention tasks.

<sup>b</sup>Actigraphy effects estimated from cell means in authors' table may be over- or underestimated.

TABLE S5 Studies of Children Who Were Preselected to Be Diet Responsive Versus Those Not Preselected

|                                           | Studies | N   | g    | CI       | p    | Q    | p    | $\tau$ | I <sup>2</sup> |
|-------------------------------------------|---------|-----|------|----------|------|------|------|--------|----------------|
| <b>Parent</b>                             |         |     |      |          |      |      |      |        |                |
| All studies                               |         |     |      |          |      |      |      |        |                |
| Not preselected                           | 5       | 593 | .199 | .09-.31  | .001 | 6.0  | .20  | .07    | 33%            |
| Selected                                  | 15      | 221 | .192 | .02-.36  | .023 | 36.4 | .001 | .24    | 61%            |
| Difference between groups: $p = .95$ (NS) |         |     |      |          |      |      |      |        |                |
| High-quality studies                      |         |     |      |          |      |      |      |        |                |
| Not preselected                           | 3       | 515 | .15  | .07-.24  | .001 | 3.6  | .16  | .08    | 45%            |
| Selected                                  | 8       | 123 | .11  | .01-.22  | .041 | 23.8 | .001 | .26    | 71%            |
| Difference between groups: $p = .73$ (NS) |         |     |      |          |      |      |      |        |                |
| <b>Teacher</b>                            |         |     |      |          |      |      |      |        |                |
| All studies                               |         |     |      |          |      |      |      |        |                |
| Not preselected                           | 4       | 267 | .21  | -.04-.46 | .09  | 7.7  | .052 | .194   | 61%            |
| Selected                                  | 6       | 78  | .06  | -.12-.24 | .52  | 0.9  | .96  | .00    | .00%           |
| Difference between groups: $p = .33$ (NS) |         |     |      |          |      |      |      |        |                |
| High-quality studies                      |         |     |      |          |      |      |      |        |                |
| Not preselected                           | 3       | 257 | .27  | -.05-.60 | .09  | 7.4  | .02  | .23    | 73%            |
| Selected                                  | 5       | 50  | .12  | -.10-.35 | .29  | 0.6  | .97  | .00    | .00%           |
| Difference between groups: $p = .45$ (NS) |         |     |      |          |      |      |      |        |                |
| <b>Tests of Attention</b>                 |         |     |      |          |      |      |      |        |                |
| Not preselected                           | 2       | 106 | .33  | -.06-.72 | .09  | 2.6  | .11  | .23    | 61%            |
| Preselected                               | 5       | 67  | .22  | .05-.45  | .01  | 3.9  | .41  | .00    | .00%           |
| Difference between groups: $p = .62$ (NS) |         |     |      |          |      |      |      |        |                |

Note: Two studies selected children to be hyperactive, but did not further select for diet sensitivity before giving the food color challenge. Williams et al (1978)<sup>21</sup> gave a challenge to 26 children with high hyperactivity scores and obtained parent and observer ratings. Parent ratings yielded  $g = 0.56$ ; teacher ratings yielded  $g = 0.51$ . Swanson and Kinsbourne (1981)<sup>18</sup> conducted their challenge and response on the Partially Accelerated Life Test with children who were hyperactive but not previously given a dietary test, and saw a difference in response between hyperactive and nonhyperactive youngsters, although the pattern was difficult to interpret. CI = confidence interval; NS = not significant.

## SUPPLEMENTARY REFERENCES

1. Rapp DJ. Does diet affect hyperactivity? *J Learn Disabil.* 1978;11:383-389.
2. David TJ. Reactions to dietary tartrazine. *Arch Dis Child.* 1987;62:119-122.
3. Pollock I, Warner JO. Effect of artificial food colours on childhood behaviour. *Arch Dis Child.* 1990;65:74-77.
4. Adams W. Lack of behavioral effects from Feingold diet violations. *Percept Mot Skills.* 1981;52:307-313.
5. Bateman B, Warner JO, Hutchinson E, *et al.* The effects of a double blind, placebo controlled, artificial food colourings and benzoate preservative challenge on hyperactivity in a general population sample of preschool children. *Arch Dis Child.* 2004;89:506-511.
6. Conners CK. Foods, food dyes, and allergies. In: *Food Additives and Hyperactive Children.* New York: Plenum 1980;77-85.
7. Conners CK, Goyette CH, Newman EB. Dose-time effect of artificial colors in hyperactive children. *J Learn Disabil.* 1980;13:512-516.
8. Goyette GH, Connors CK, Petti TA, Curtis LE. Effects of artificial colors on hyperkinetic children: a double-blind challenge study [proceedings]. *Psychopharmacol Bull.* 1978;14:39-40.
9. Gross MD, Tofanelli RA, Butzirus SM, Snodgrass EW. The effect of diets rich in and free from additives on the behavior of children with hyperkinetic and learning disorders. *J Am Acad Child Adolesc Psychiatry.* 1987;26:53-55.
10. Harley JP, Ray RS, Tomasi L, *et al.* Hyperkinesis and food additives: testing the Feingold hypothesis. *Pediatrics.* 1978;61:818-828.
11. Levy F, Hobbes G. Hyperkinesis and diet: a replication study. *Am J Psychiatry.* 1978;135:1559-1560.
12. Mattes JA, Gittelman R. Effects of artificial food colorings in children with hyperactive symptoms. A critical review and results of a controlled study. *Arch Gen Psychiatry.* 1981;38:714-718.
13. McCann D, Barrett A, Cooper A, *et al.* Food additives and hyperactive behaviour in 3-year-old and 8/9-year-old children in the community: a randomised, double-blinded, placebo-controlled trial. *Lancet.* 2007;370:1560-1567.
14. Rowe KS. Synthetic food colourings and 'hyperactivity': a double-blind crossover study. *Aust Paediatr J.* Apr 1988;24:143-147.
15. Rowe KS, Rowe KJ. Synthetic food coloring and behavior: a dose response effect in a double-blind, placebo-controlled, repeated-measures study. *J Pediatr.* 1994;125:691-698.
16. Sarantinos J, Rowe KS, Briggs DR. Synthetic food colouring and behavioural change in children with attention deficit disorder: a double-blind, placebo-controlled, repeated measures study. *Proc Nutr Soc Australia.* 1990;15:233.
17. Spring C, Vermeersch J, Blunden D, Sterling H. Case studies of effects of artificial food colors on hyperactivity. *J Spec Educ* 1981;15:361-372.
18. Swanson JM, Kinsbourne M. Food dyes impair performance of hyperactive children on a laboratory learning test. *Science.* 1980;207:1485-1487.
19. Thorley G. Pilot study to assess behavioural and cognitive effects of artificial food colours in a group of retarded children. *Dev Med Child Neurol.* 1984;26:56-61.
20. Uhlig T, Merkenschlager A, Brandmaier R, Egger J. Topographic mapping of brain electrical activity in children with food-induced attention deficit hyperkinetic disorder. *Eur J Pediatr.* 1997;156:557-561.
21. Williams JI, Cram DM, Tausig FT, Webster E. Relative effects of drugs and diet on hyperactive behaviors: an experimental study. *Pediatrics.* 1978;61:811-817.
22. Wilson N, Scott A. A double-blind assessment of additive intolerance in children using a 12 day challenge period at home. *Clin Exp Allergy.* 1989;19:267-272.
23. Adams W. Lack of behavioral effects from Feingold diet violations. *Percept Mot Skills.* Feb 1981;52:307-313.
24. Weiss B, Williams JH, Margen S, *et al.* Behavioral responses to artificial food colors. *Science.* 1980;207:1487-1489.
